# Supplementary material for: Thoracoabdominal Calcifications Predict Cardiovascular Disease Mortality in Type 2 Diabetic and Nondiabetic Subjects: 18-year follow-up study
Source: PubMed Central journal article supplement — Diabetes Care. 2009 Dec 15;33(3):583–5. doi: 10.2337/dc09-1813 (PMC2827512; doi:10.2337/dc09-1813), 2009-12-15

**Online-Appendix Table A1:** Baseline characteristics given in mean (SD) or percentages between groups of no vs. gradus 1-3 thoracoabdominal calcifications in type 2 diabetic (n=833) and in nondiabetic subjects (n=1292).

|                                                | Type 2 Diabetic Subjects   |                           |          | Nondiabetic Subjects       |                           |          |
|------------------------------------------------|----------------------------|---------------------------|----------|----------------------------|---------------------------|----------|
|                                                | No calcification (Grade 0) | Calcification (Grade 1-3) | <i>P</i> | No calcification (Grade 0) | Calcification (Grade 1-3) | <i>P</i> |
| Age (years)                                    | 55.7 (5.8)                 | 58.6 (4.5)                | <0.001   | 52.8 (5.2)                 | 56.2 (5.4)                | <0.001   |
| Gender (% of male)                             | 48.9%                      | 52.2%                     | 0.399    | 37.7%                      | 51.3%                     | <0.001   |
| Hypertension (%)                               | 52.3%                      | 65.3%                     | 0.001    | 26.2%                      | 36.6%                     | <0.001   |
| Current smoking (%)                            | 15.6%                      | 17.1%                     | 0.600    | 14.5%                      | 23.1%                     | <0.001   |
| Systolic blood pressure (mmHg)                 | 147 (20)                   | 155 (24)                  | <0.001   | 138 (20)                   | 144 (21)                  | <0.001   |
| Diastolic blood pressure (mmHg)                | 85 (11)                    | 86 (12)                   | 0.309    | 83 (10)                    | 85 (11)                   | 0.001    |
| Pulse pressure (mmHg)                          | 61 (17)                    | 69 (21)                   | <0.001   | 55 (16)                    | 58 (16)                   | <0.001   |
| BMI (kg/m <sup>2</sup> )                       | 29 (6)                     | 29 (5)                    | 0.638    | 26 (4)                     | 27 (4)                    | 0.015    |
| Total cholesterol (mmol/l)                     | 6.7 (1.9)                  | 6.7 (1.6)                 | 0.885    | 6.6 (1.3)                  | 6.9 (1.3)                 | <0.001   |
| HDL cholesterol (mmol/l)                       | 1.26 (0.35)                | 1.23 (0.37)               | 0.267    | 1.52 (0.37)                | 1.49 (0.40)               | 0.108    |
| Triglycerides (mmol/l)*                        | 2.52 (3.31)                | 2.48 (2.66)               | 0.631    | 1.31 (0.62)                | 1.48 (0.75)               | <0.001   |
| Estimated glomerular filtration rate (ml/min)† | 101 (30)                   | 98 (28)                   | 0.305    | 89 (20)                    | 90 (22)                   | 0.504    |
| Fasting glucose (mmol/l)                       | 11.5 (3.8)                 | 11.7 (3.8)                | 0.490    | 5.4 (0.6)                  | 5.5 (0.7)                 | 0.020    |
| GhbA <sub>1</sub> (%)‡                         | 9.9 (2.6)                  | 9.9 (2.1)                 | 0.741    | -                          | -                         | -        |
| Diabetes duration (years)                      | 7.9 (3.9)                  | 8.0 (4.0)                 | 0.931    | -                          | -                         | -        |
| hs-CRP§ > 3 mg/l (%)                           | 26.8%                      | 35.6%                     | 0.021    | 16.6%                      | 20.6%                     | 0.088    |
| ApoB/ApoA1                                     | 1.5 (0.5)                  | 1.6 (0.5)                 | 0.022    | 1.4 (0.4)                  | 1.5 (0.4)                 | <0.001   |
| Urinary protein (g/l)*                         | 0.22 (0.41)                | 0.29 (0.65)               | 0.007    | 0.09 (0.13)                | 0.11 (0.22)               | 0.044    |

\*Tested after logarithmic transformation; †Cockcroft-Gault estimate; ‡Glycated haemoglobin A<sub>1</sub>; §High-sensitivity C-reactive protein; ||Apolipoprotein B/Apolipoprotein A1

**Online-Appendix Table A2:** Hazard ratio (95% CI) of CVD mortality in Cox multivariate model for thoracoabdominal calcifications of grade 1 or grade 2, and grade 3 in comparison to grade 0.

|                                 | Grade 1 vs Grade 0 | Grade 2 vs Grade 0 | Grade 3 vs Grade 0 | <i>P</i> for linear trend |
|---------------------------------|--------------------|--------------------|--------------------|---------------------------|
| <b>Cardiovascular mortality</b> |                    |                    |                    |                           |
| Type 2 diabetic men             | 1.4 (0.9-2.1)      | 1.5 (0.9-2.5)      | 1.5 (0.8-3.0)      | 0.358                     |
| Type 2 diabetic women           | 1.5 (1.0-2.3)      | 1.4 (0.9-2.2)      | 3.0 (1.6-5.7)      | 0.006                     |
| Nondiabetic men                 | 1.0 (0.5-1.9)      | 2.4 (1.2-5.0)      | 5.0 (2.2-12)       | <0.001                    |
| Nondiabetic women               | 1.3 (0.4-2.9)      | 3.1 (0.8-12)       | 7.8 (1.8-34)       | 0.033                     |
| <b>Total mortality</b>          |                    |                    |                    |                           |
| Type 2 diabetic men             | 1.2 (0.9-1.6)      | 1.3 (0.9-2.0)      | 1.8 (1.1-2.9)      | 0.116                     |
| Type 2 diabetic women           | 1.3 (1.0-1.8)      | 1.3 (0.9-1.9)      | 3.1 (1.9-5.0)      | <0.001                    |
| Nondiabetic men                 | 0.9 (0.5-1.4)      | 2.2 (1.3-3.5)      | 4.0 (2.2-7.4)      | <0.001                    |
| Nondiabetic women               | 1.4 (0.8-2.4)      | 1.9 (1.0-3.7)      | 3.0 (1.3-7.0)      | 0.061                     |

\*Adjusted for age, gender, area of residence, current smoking, BMI, systolic blood pressure, total cholesterol, HDL cholesterol, HbA<sub>1</sub> or fasting glucose (in nondiabetic subjects), duration of diabetes (in diabetic subjects), Cockcroft-Gault estimate of glomerular filtration rate, and urinary protein (log).

**Online-Appendix Figure A1** Cardiovascular disease survival during 18-year follow-up in men and women without prior cardiovascular disease by the status of diabetes and the presence of thoracoabdominal calcifications.

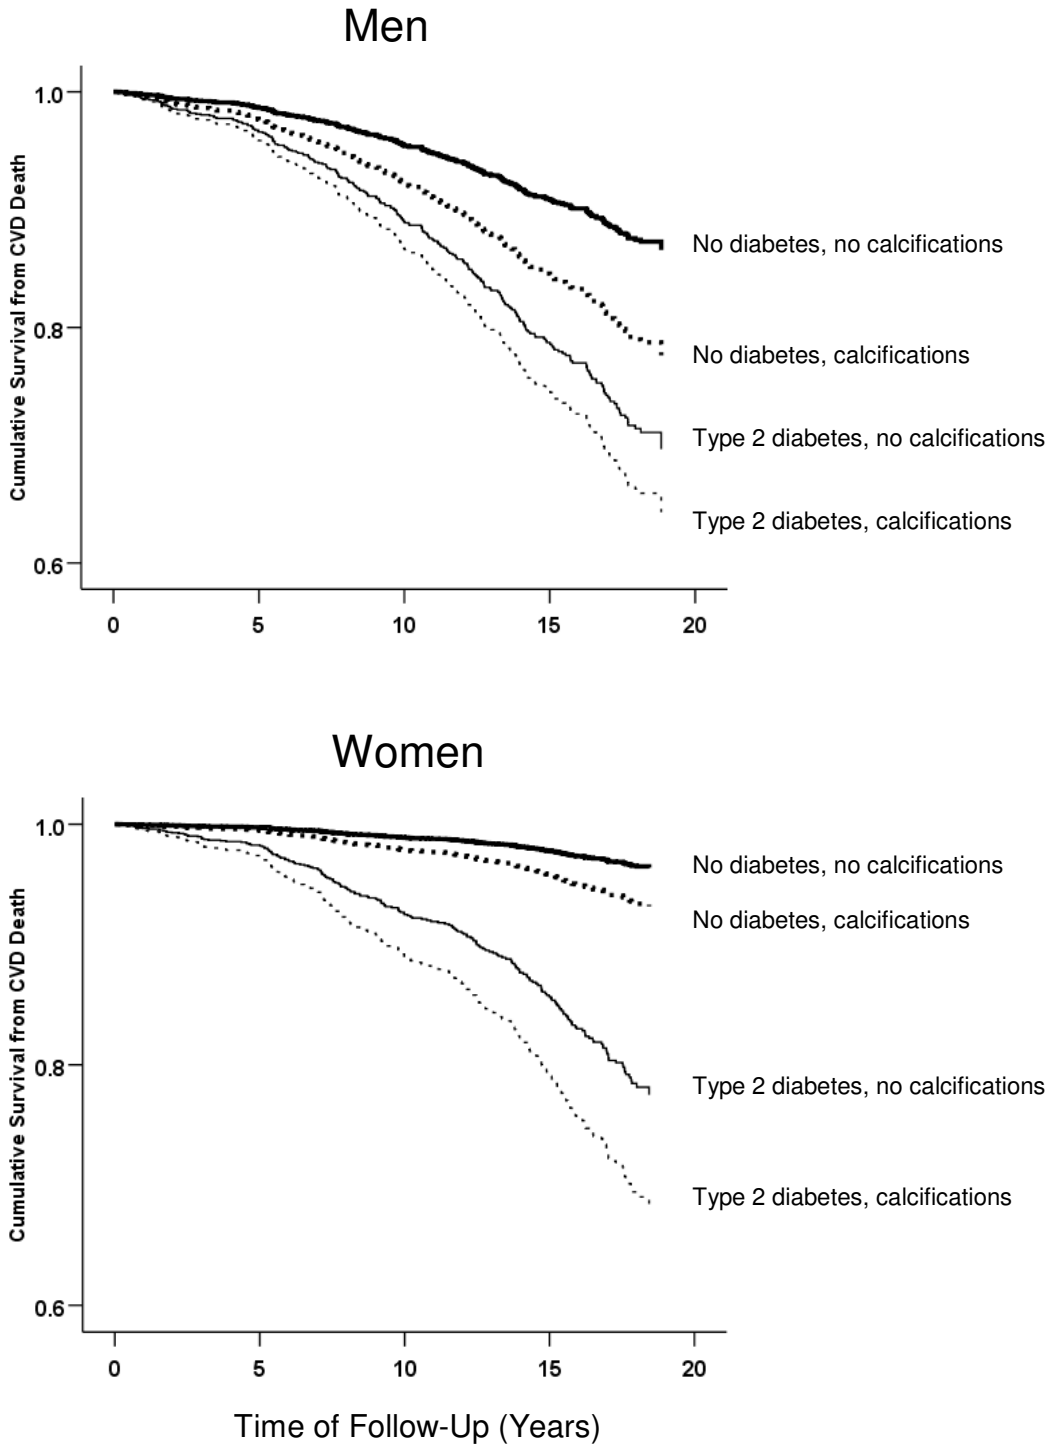

**Online-Appendix Figure A2.** The combination of thoracoabdominal calcifications and high-sensitivity C-reactive protein in association with cardiovascular and total mortality during 18-year follow-up in type 2 diabetic and nondiabetic subjects without prior cardiovascular disease.

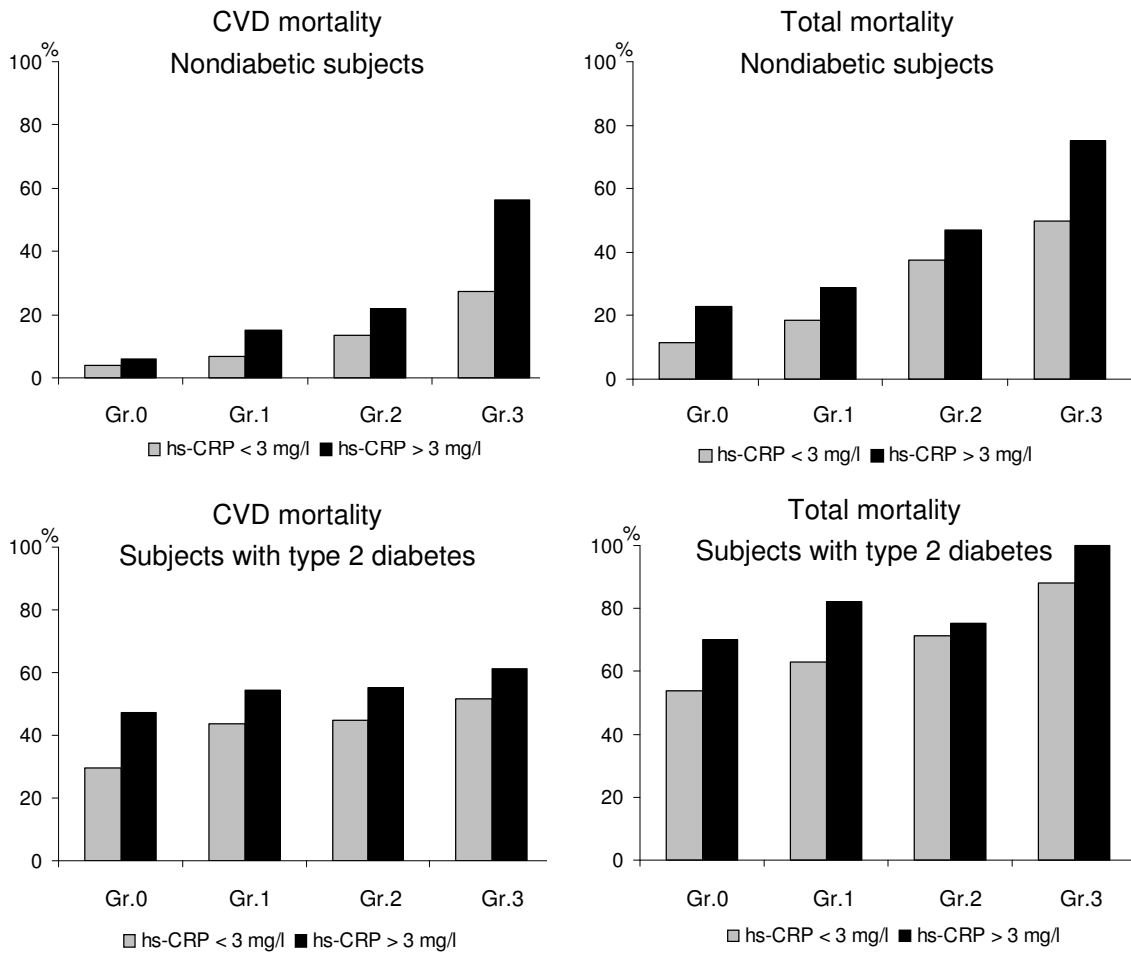

Supplement: supp_dc09-1813_dc09-1813_Online_Appendix.pdf [file supp_dc09-1813_dc09-1813_Online_Appendix.pdf]
